# Supplementary material for: Highly stable electrocatalysts supported on nitrogen-self-doped three-dimensional graphene-like networks with hierarchical porous structures
Source: Royal Society of Chemistry journal article supplement (doi:10.1039/c4ta05552g), 2014-12-01
Supplement: c4ta05552g1.pdf [file c4ta05552g1.pdf]

---

## Supporting Information

### Highly stable electrocatalysts supported on nitrogen-self-doped three-dimensional graphene-like networks with hierarchical porous structure

Juhong Cheng,<sup>a</sup> Yunyong Li,<sup>a</sup> Xiangdong Huang,<sup>\*b</sup> Qingquan Wang,<sup>b</sup> Ao Mei,<sup>b</sup> Pei Kang Shen,<sup>\*a</sup>

*a* State Key Laboratory of Optoelectronic Materials and Technologies, School of Physics and Engineering, Sun Yat-sen University, 135 Xingang Road, Guangzhou, 510275, PR China. E-mail : stssp k@mail.sysu .edu.cn; Fax: +86-20-84036736; Tel: +86-20-84036736

*b* Automotive Engineering Institute, Guangzhou Automobile Group Co., Ltd, Guangzhou, 510640, PR China. E-mail : [huangxd@gaei.cn](mailto:huangxd@gaei.cn)

#### Synthesis of 3D-GNs

For the preparation of nitrogen-free three-dimensional graphene-like networks (denoted as 3D GNs), 10 g pretreated macroporous acrylic type cation-exchange D113 resin was firstly impregnated with 100 mL 0.05 mol L<sup>-1</sup> of Co(NO<sub>3</sub>)<sub>2</sub> solution, then the dried exchanged resin was added into 400 mL KOH/ethanol solution containing 15 g KOH for activation. Finally, the mixture was heated at 850 °C for 2 h in N<sub>2</sub> atmosphere with a heating rate of 2 °C min<sup>-1</sup>. The 3D GNs was further treated with HCl solutions, washed by deionized water and dried at 120 °C for 5 h.

#### Synthesis of C-Pristine

10 g pretreated macroporous acrylic type cation-exchange D113 resin was directly heated at 850 °C for 2 h in N<sub>2</sub> atmosphere. After cooling down to room temperature, the C-Pristine was washed by deionized water and then dried at 120 °C for 5 h.

#### Synthesis of Pt/N-3D GNs, Pt/3D GNs and Pt/C-Pristine

In a typical synthesis, 3 ml (15 mgPt ml<sup>-1</sup>) chloroplatinic acid was well mixed with ethylene glycol (EG, 50 ml) in an ultrasonic bath. Then, the N-3D GNs (or 3D GNs and C-Pristine, 55 mg) was added into the mixture. The pH of the mixture was adjusted to 10 by a dilute KOH/EG solution. The mixture

was microwave-heated in the form of 5 s-on/5 s-off for several times. The resulting black solid sample was acidified, filtered, washed and dried at 80 °C for 12 h in a vacuum oven.

**Table S1** Resistivity under different pressure of various supporting materials

| Samples    | Resistivity under different pressure/ ( $\Omega$ *cm) |       |       |       |       |
|------------|-------------------------------------------------------|-------|-------|-------|-------|
|            | 1MPa                                                  | 2MPa  | 4MPa  | 6MPa  | 8MPa  |
| C-Pristine | 5.21                                                  | 2.70  | 1.536 | 1.113 | 0.880 |
| N-3D GNs   | 0.394                                                 | 0.255 | 0.180 | 0.148 | 0.126 |
| 3D GNs     | 0.373                                                 | 0.239 | 0.169 | 0.136 | 0.114 |

**Table.S2** surface area and pore structure summary of N-3D GN, Pt/N-3D GNs, 3D GNs, and C-Pristine

| Samples     | $S_{BET}$   | $V_{0.98t}^a$ | $V_{mi}^b$   | $V_{mea}^c$  |
|-------------|-------------|---------------|--------------|--------------|
|             | ( $m^2/g$ ) | ( $cm^3/g$ )  | ( $cm^3/g$ ) | ( $cm^3/g$ ) |
| C-Pristine  | 137.8       | 1.999         | 0.0421       | 0.1578       |
| 3D GNs      | 729         | 0.5393        | 0.3003       | 0.2390       |
| N-3D GNs    | 745         | 0.6018        | 0.2214       | 0.3804       |
| Pt/N-3D GNs | 511         | 0.4709        | 0.2027       | 0.2682       |

<sup>a</sup> Single point desorption to total pore volume of pores at  $P/P_0 = 0.98$ .

<sup>b</sup> t-Plot micropore volume.

<sup>c</sup> Mesopore and macropore volume obtained by subtracting  $V_{mi}$  from  $V_{0.98t}$ .

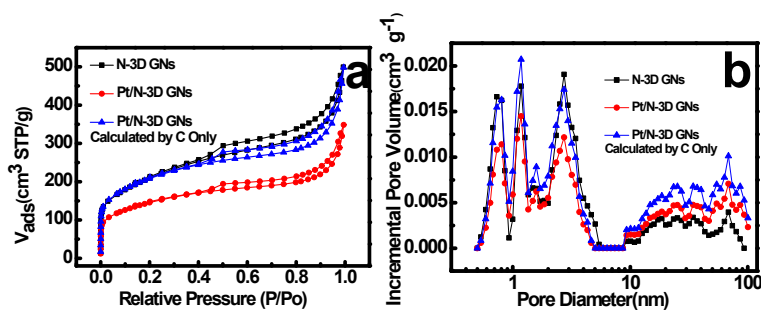

**Fig.S1.** Nitrogen adsorption/desorption isotherms (a) and DFT pore-size distribution curves (b) of N-3D GNs, Pt/N-3D GNs and Pt/N-3D GNs Calculated by C Only.

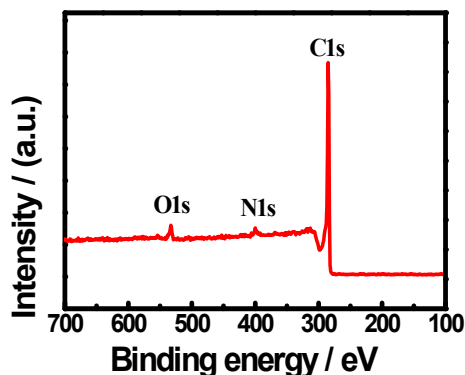

**Fig.S2.** XPS spectrum of N-3D GNs

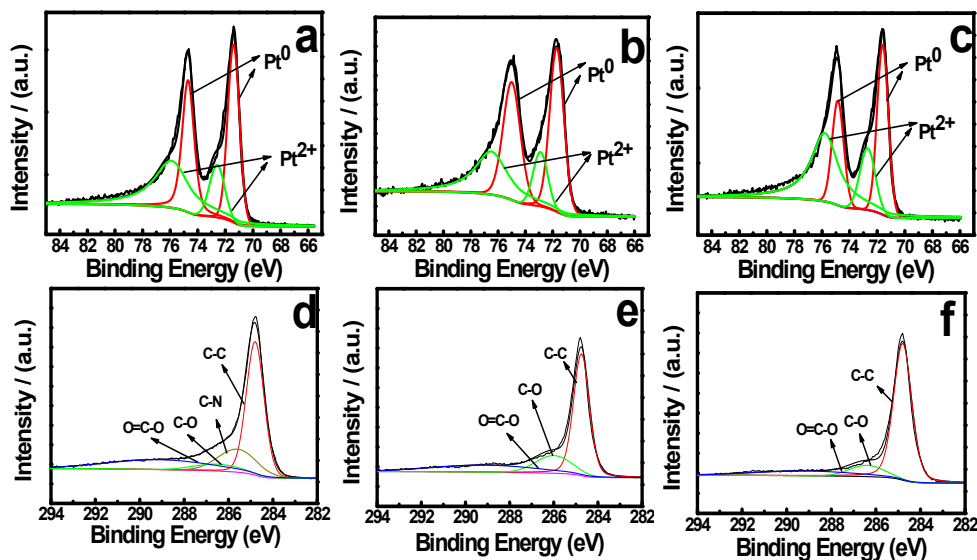

**Fig.S3** (a, b, c) XPS core level spectra of Pt4f for Pt/N-3D GNs, Pt/C-Pristine and Pt/3D GNs, respectively; (d, e, f) XPS core level spectra of C1s for Pt/N-3D GNs, Pt/C-Pristine and Pt/3D GNs, respectively.

**Table S3** Summary of position and assignments of C, Pt, and N components of the Pt/C-Pristine, Pt/3D GNs and Pt/N-3D GNs samples

|           | Pt/C-Pristine |                                      |            | Pt/3D GNs |                                      |            | Pt/N-3D GNs |                                      |            |
|-----------|---------------|--------------------------------------|------------|-----------|--------------------------------------|------------|-------------|--------------------------------------|------------|
|           | Position      | Attribution                          | Percentage | Position  | Attribution                          | Percentage | Position    | Attribution                          | Percentage |
| <b>C</b>  | 284.6         | C-C                                  | 75.9       | 284.6     | C-C                                  | 60.6       | 284.6       | C-C                                  | 63.4       |
|           | 286.5         | C-O                                  | 10.7       | 286.5     | C-O                                  | 18.3       | 285.6       | C-N                                  | 10.4       |
|           | 289.1         | O=C-O                                | 13.4       | 289.1     | O=C-O                                | 21.1       | 286.5       | C-O                                  | 6.5        |
| <b>Pt</b> | 71.6          | Pt <sup>0</sup> (4f <sub>7/2</sub> ) | 45.5       | 71.6      | Pt <sup>0</sup> (4f <sub>7/2</sub> ) | 55.2       | 71.6        | Pt <sup>0</sup> (4f <sub>7/2</sub> ) | 61.1       |
|           | 74.8          | Pt <sup>0</sup> (4f <sub>5/2</sub> ) |            | 74.8      | Pt <sup>0</sup> (4f <sub>5/2</sub> ) |            | 74.8        | Pt <sup>0</sup> (4f <sub>5/2</sub> ) |            |
|           | 72.4          | Pt <sup>2+</sup>                     | 54.5       | 72.4      | Pt <sup>2+</sup>                     | 44.8       | 289.1       | O=C-O                                | 19.7       |

---

|   |    |                  |    |                  |       |                  |      |
|---|----|------------------|----|------------------|-------|------------------|------|
| N | 76 | Pt <sup>2+</sup> | 76 | Pt <sup>2+</sup> | 76    | Pt <sup>2+</sup> |      |
|   |    |                  |    |                  | 398.5 | Pyridine N       | 45.9 |
|   |    |                  |    |                  | 400.2 | Pyrrole N        | 30.1 |
|   |    |                  |    |                  | 401.1 | Graphitic N      | 24   |

---
